# Supplementary material for: Efficacy and safety of filgotinib in methotrexate-naive patients with rheumatoid arthritis with poor prognostic factors: post hoc analysis of FINCH 3
Source: HighWire-hosted journal article supplement (doi:10.1136/rmdopen-2021-001621), 2021-08-01
Supplement: rmdopen-2021-001621supp001_data_supplement.pdf [file rmdopen-2021-001621supp001_data_supplement.pdf]

## SUPPLEMENTAL MATERIAL

### Supplemental methods

#### *Radiographic progression based on change in van der Heijde modified total Sharp score (mTSS)*

The mTSS change from baseline was scored in Campaign A, which included baseline and week 24 radiographs, and Campaign B, comprising all radiographs from patients for whom new radiographs were taken after week 24, including re-reading of radiographs taken at baseline and week 24. Change from baseline in mTSS at week 24 is reported in Campaign A only and analysed as described for other continuous endpoints in the main text. For mTSS change from baseline at week 52 in the overall population and in patients with 4 poor prognostic factors, combined Campaign A and Campaign B data were analysed using a linear mixed-effects model (multilevel) to evaluate the repeated measurements at different time points within different campaigns (levels) with treatment, visit (as categorical), treatment by visit, stratification factors (overall population only) and baseline value in the model and nested in each campaign; campaign was a random effect. Missing change scores were not imputed using the MMRM approach. For proportions of patients with no radiographic progression at week 24, the 95% confidence interval for response rate and difference in response rates were based on a normal approximation method with a continuity correction; missing data were not imputed. For the overall population, *P* values were calculated from the logistic regression with treatment groups and stratification factors in the model; Fisher's exact test was used for comparisons between each filgotinib treatment arm vs methotrexate monotherapy in patients with 4 poor prognostic factors. Proportions of patients with no radiographic progression at week 52 are presented as odds ratios and 95% CI for filgotinib treatment vs MTX monotherapy from a generalised linear mixed-effects model (multilevel) to evaluate the repeated measurements at different time points within different campaigns (levels).

**Supplemental Table 1.** Patients with 4 poor prognostic factors and the overall population with no radiographic progression from baseline at week 24

|                                                    | FIL 200 mg + MTX |                | FIL 100 mg + MTX |                | FIL 200 mg     |                | MTX            |                |
|----------------------------------------------------|------------------|----------------|------------------|----------------|----------------|----------------|----------------|----------------|
|                                                    | PPF              | Overall        | PPF              | Overall        | PPF            | Overall        | PPF            | Overall        |
| <b>n</b>                                           | 151              | 355            | 74               | 184            | 70             | 173            | 145            | 356            |
| <b><math>\Delta</math>mTSS <math>\leq 0</math></b> |                  |                |                  |                |                |                |                |                |
| %                                                  | 77.5             | 80.6           | 59.5             | 76.6           | 77.1           | 82.7           | 61.4           | 72.5           |
| (95% CI)                                           | (70.5 to 84.5)   | (76.3 to 84.8) | (47.6 to 71.3)   | (70.2 to 83.0) | (66.6 to 87.7) | (76.7 to 88.6) | (53.1 to 69.6) | (67.7 to 77.3) |
| Difference vs MTX                                  | 16.1             | 8.1            | -1.9             | 4.2            | 15.8           | 10.2           |                |                |
| (95% CI)                                           | (5.1 to 27.1)    | (1.6 to 14.6)  | (-16.6 to 12.8)  | (-3.9 to 12.2) | (2.1 to 29.5)  | (2.5 to 17.9)  |                |                |
| Nominal <i>P</i>                                   | 0.004            | 0.015          | 0.88             | 0.33           | 0.030          | 0.013          |                |                |

Campaign A data.

$\Delta$ , change from baseline; CI, confidence interval; FIL, filgotinib; mTSS, van der Heijde modified total Sharp score; MTX, methotrexate; PPF, patients with 4 poor prognostic factors.

**Supplemental Table 2.** Odds ratios and 95% CI for no radiographic progression at week 52 following treatment with filgotinib vs MTX monotherapy

|                                                    | FIL 200 mg + MTX |           | FIL 100 mg + MTX |            | FIL 200 mg |            |
|----------------------------------------------------|------------------|-----------|------------------|------------|------------|------------|
|                                                    | PPF              | Overall   | PPF              | Overall    | PPF        | Overall    |
| <b><math>\Delta</math>mTSS <math>\leq 0</math></b> |                  |           |                  |            |            |            |
| Odds ratio vs MTX                                  | 2.3              | 1.9       | 1.8              | 1.5        | 1.8        | 1.5        |
| (95% CI)                                           | (1.3–4.1)        | (1.3–2.9) | (0.96–3.5)       | (0.96–2.4) | (0.93–3.5) | (0.93–2.4) |
| Nominal <i>P</i>                                   | 0.004            | 0.001     | 0.068            | 0.072      | 0.078      | 0.099      |

Combined Campaign A and Campaign B data.

$\Delta$ , change from baseline; CI, confidence interval; FIL, filgotinib; mTSS, van der Heijde modified total Sharp score; MTX, methotrexate; PPF, patients with 4 poor prognostic factors.

**Supplemental Figure 1.** Disposition of patients with 4 poor prognostic factors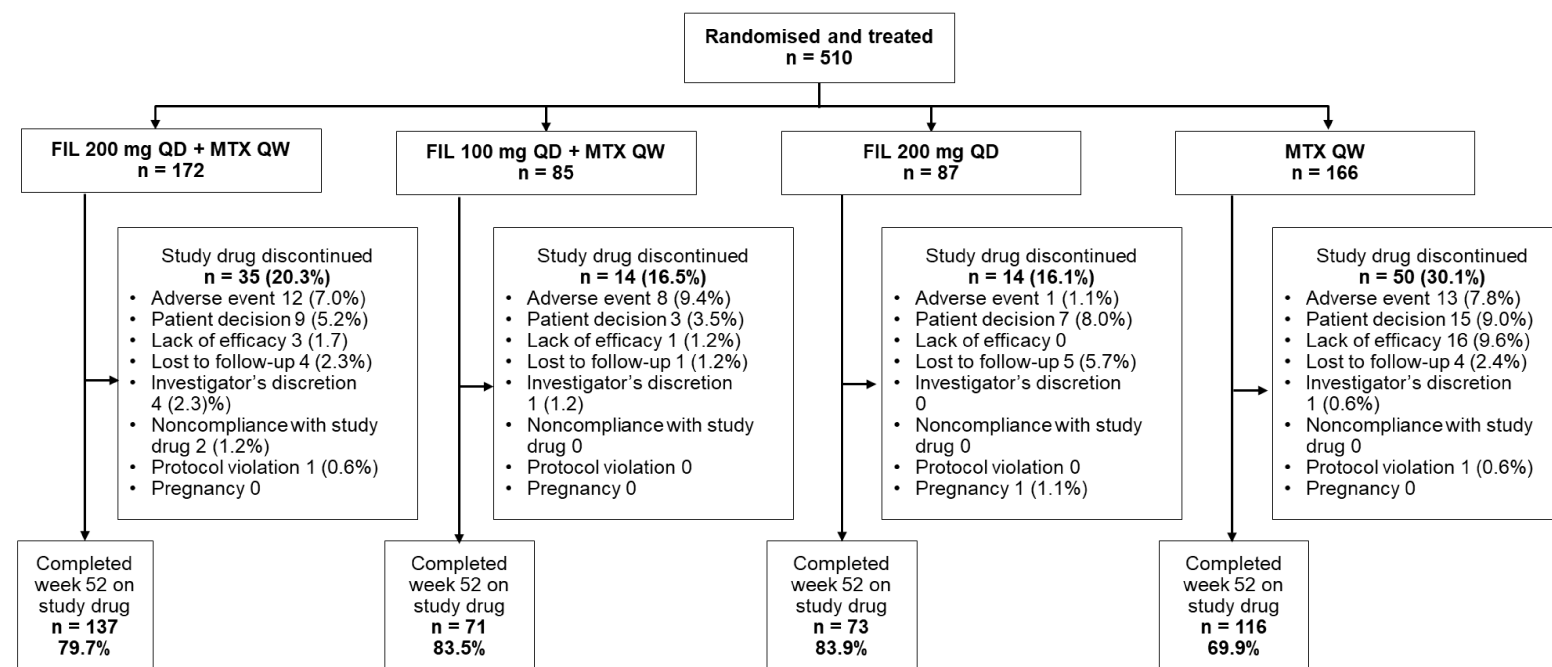

FIL, filgotinib; MTX, methotrexate; QD, once daily; QW, once weekly.

**Supplemental Figure 2.** Proportions of patients with 4 poor prognostic factors achieving **A)** ACR20 response and **B)** SDAI  $\leq 3.3$  at week 24 by baseline glucocorticoid use and disease duration

**A**

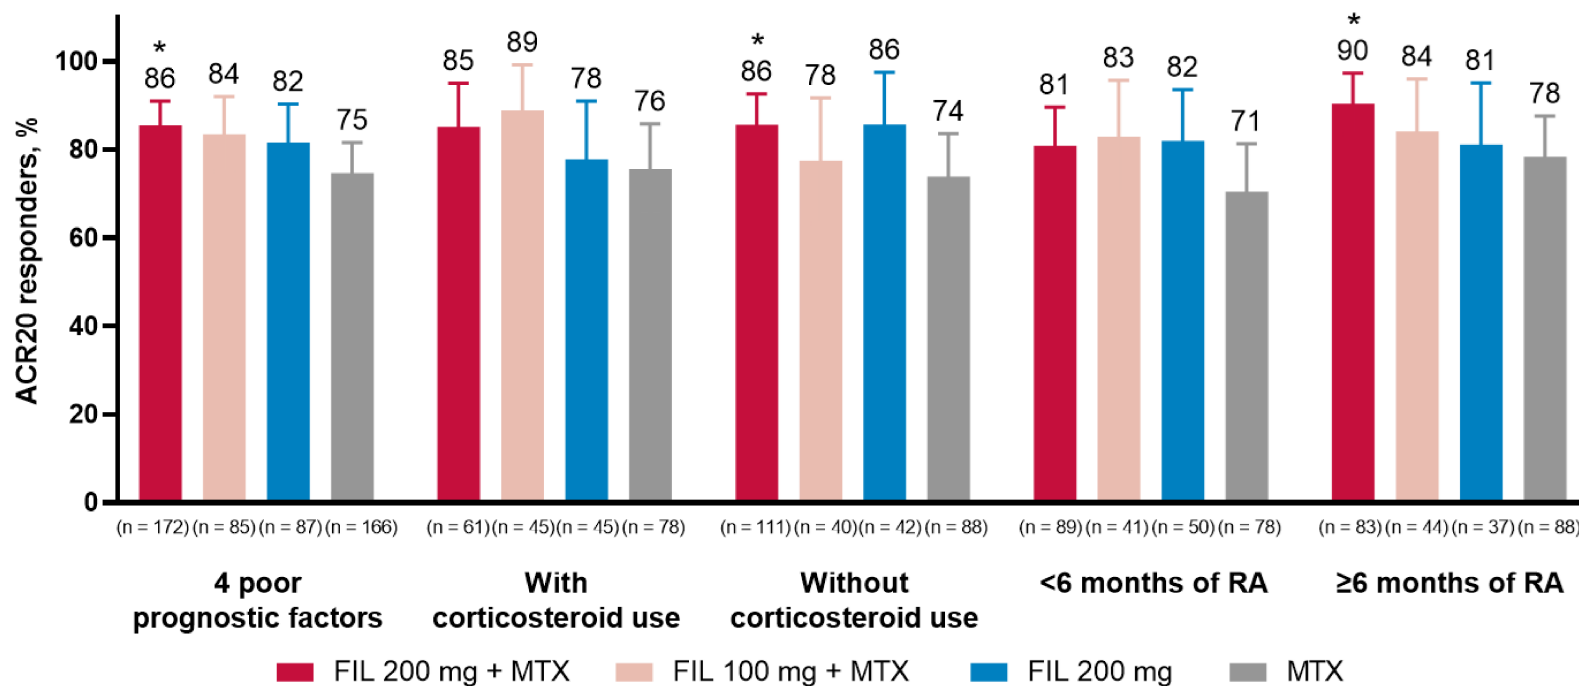

B

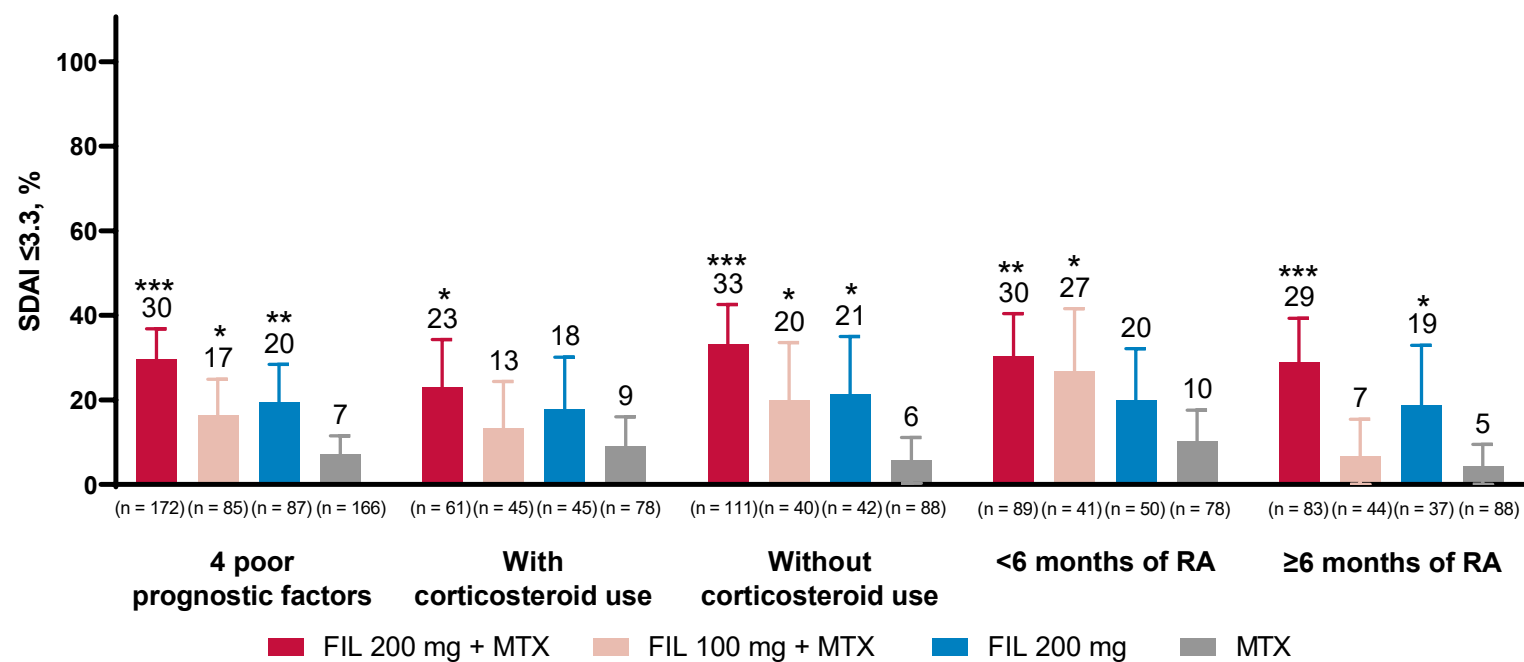

Error bars represent the 95% confidence interval.

\*Nominal  $P < 0.05$ , \*\*nominal  $P < 0.01$ , \*\*\*nominal  $P < 0.001$ .

ACR20 response, 20% improvement from baseline by American College of Rheumatology criteria; FIL, filgotinib; MTX, methotrexate; SDAI remission, Simplified Disease Activity Index  $\leq 3.3$ .

**Supplemental Figure 3.** Proportions of patients achieving SDAI remission at week 24 among **A)** overall population and patients with 4, 3, 2, or 1 poor prognostic factor(s) or patients with **B)** specific combinations of poor prognostic factors or **C)**  $\geq 1$  individual poor prognostic factor(s)

**A**

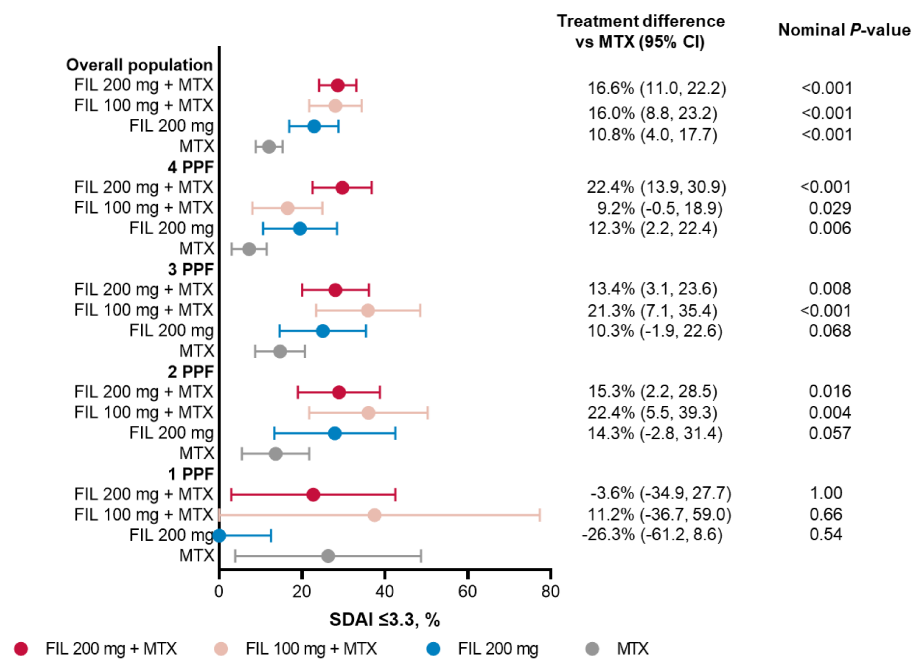

B

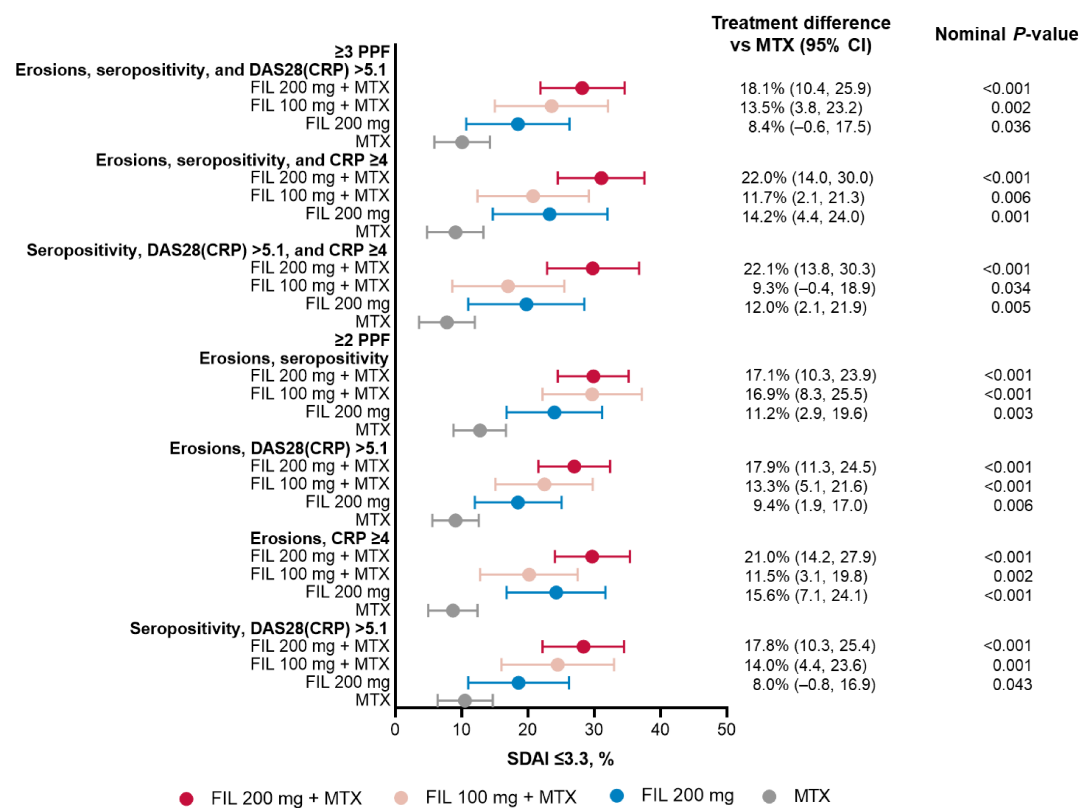



C

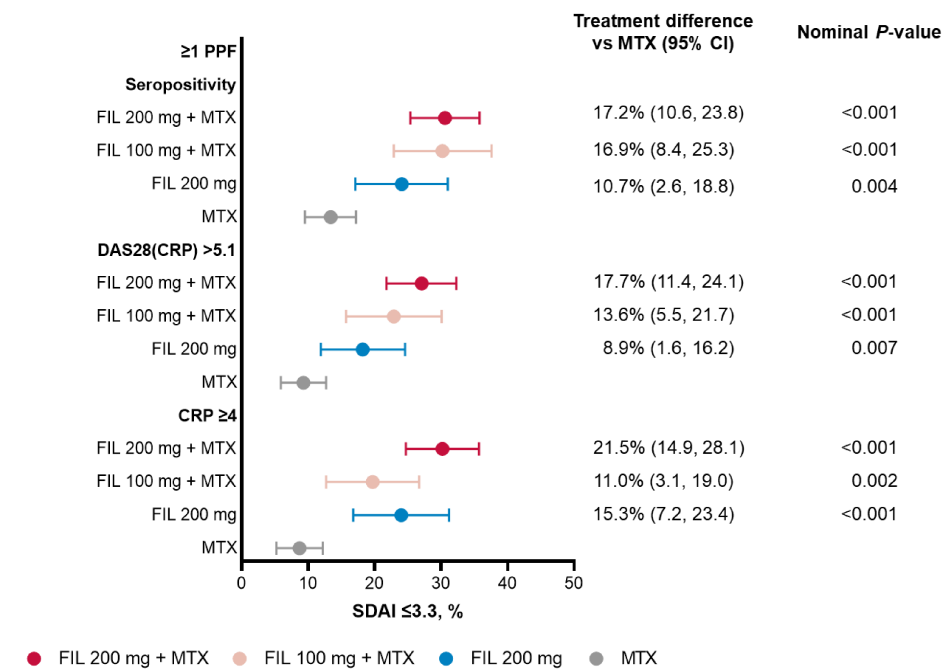

CI, confidence interval; CRP, C-reactive protein; DAS28(CRP), Disease Activity Score in 28 joints with CRP; FIL, filgotinib; MTX, methotrexate; PPF, poor prognostic factors; SDAI, Simplified Disease Activity Index.
